# Supplementary material
Source: HighWire-hosted journal article supplement (https://tsaco.smart01.highwire.org/content/8/1/e001134)
Supplement: inline-supplementary-material-1 [file inline-supplementary-material-1.pdf]

## Supplemental Digital Content

### **Development and validation of prediction scores for persistent inflammation, immunosuppression, and catabolism syndrome among trauma patients who required a protracted ICU course**

Kazuhiro Okada, MD, MPH<sup>1,2</sup>, Sachiko Ohde<sup>3</sup>, PhD, EdM, Takanori Yagi, MD<sup>1,2</sup>, Yoshiaki Hara, MD, PhD<sup>1,2</sup>, Shoji Yokobori, MD, PhD<sup>2</sup>

- |                               |                                                                                                     |
|-------------------------------|-----------------------------------------------------------------------------------------------------|
| <b>Supplementary Fig 1.</b>   | Study flowchart                                                                                     |
| <b>Supplementary Fig 2.</b>   | Kaplan-Meier curves for the survival to discharge rate                                              |
| <b>Supplementary Table 1.</b> | Characteristics of patients in the derivation and validation cohort.                                |
| <b>Supplementary Table 2.</b> | Sensitivity, specificity, and positive and negative predictive value of each score to predict PICS. |
| <b>Supplementary Table 3.</b> | Multivariable logistic regression model assessing the occurrence of PICS                            |
| <b>Supplementary Table 4.</b> | Multivariable logistic regression model assessing in-hospital mortality                             |
| <b>Supplementary Table 5.</b> | Multivariable logistic regression model assessing multiple episodes of infection                    |
| <b>Supplementary Table 6.</b> | Multivariable linear regression model assessing SOFA score at day 14                                |
| <b>Supplementary Table 7.</b> | Multivariable linear regression model assessing duration of mechanical ventilation                  |
| <b>Supplementary Table 8.</b> | Multivariable linear regression model assessing length of stay in ICU                               |
| <b>Supplementary Table 9.</b> | Multivariable linear regression model assessing length of stay in hospital                          |

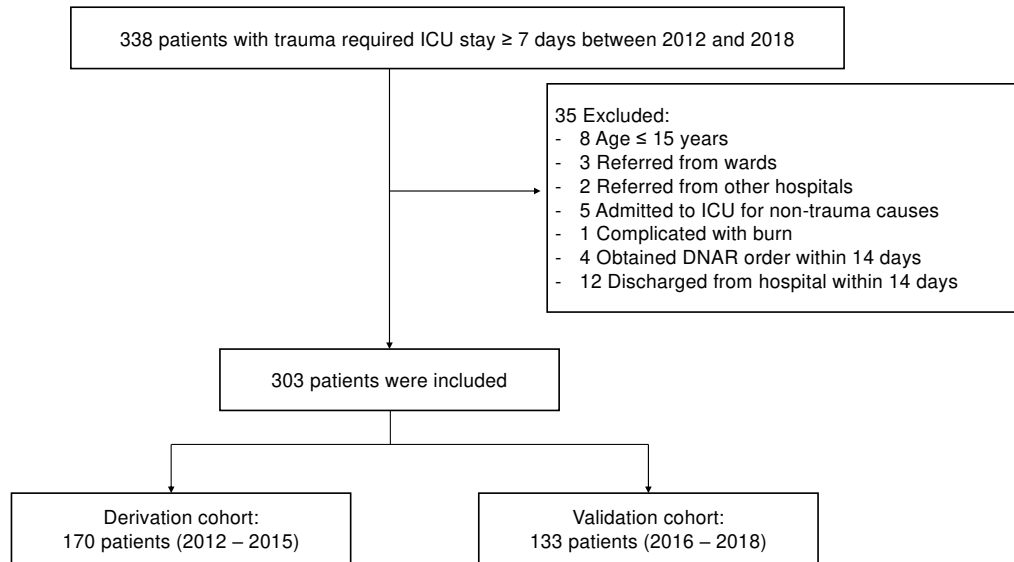

**Supplementary Fig 1.** Study flowchart

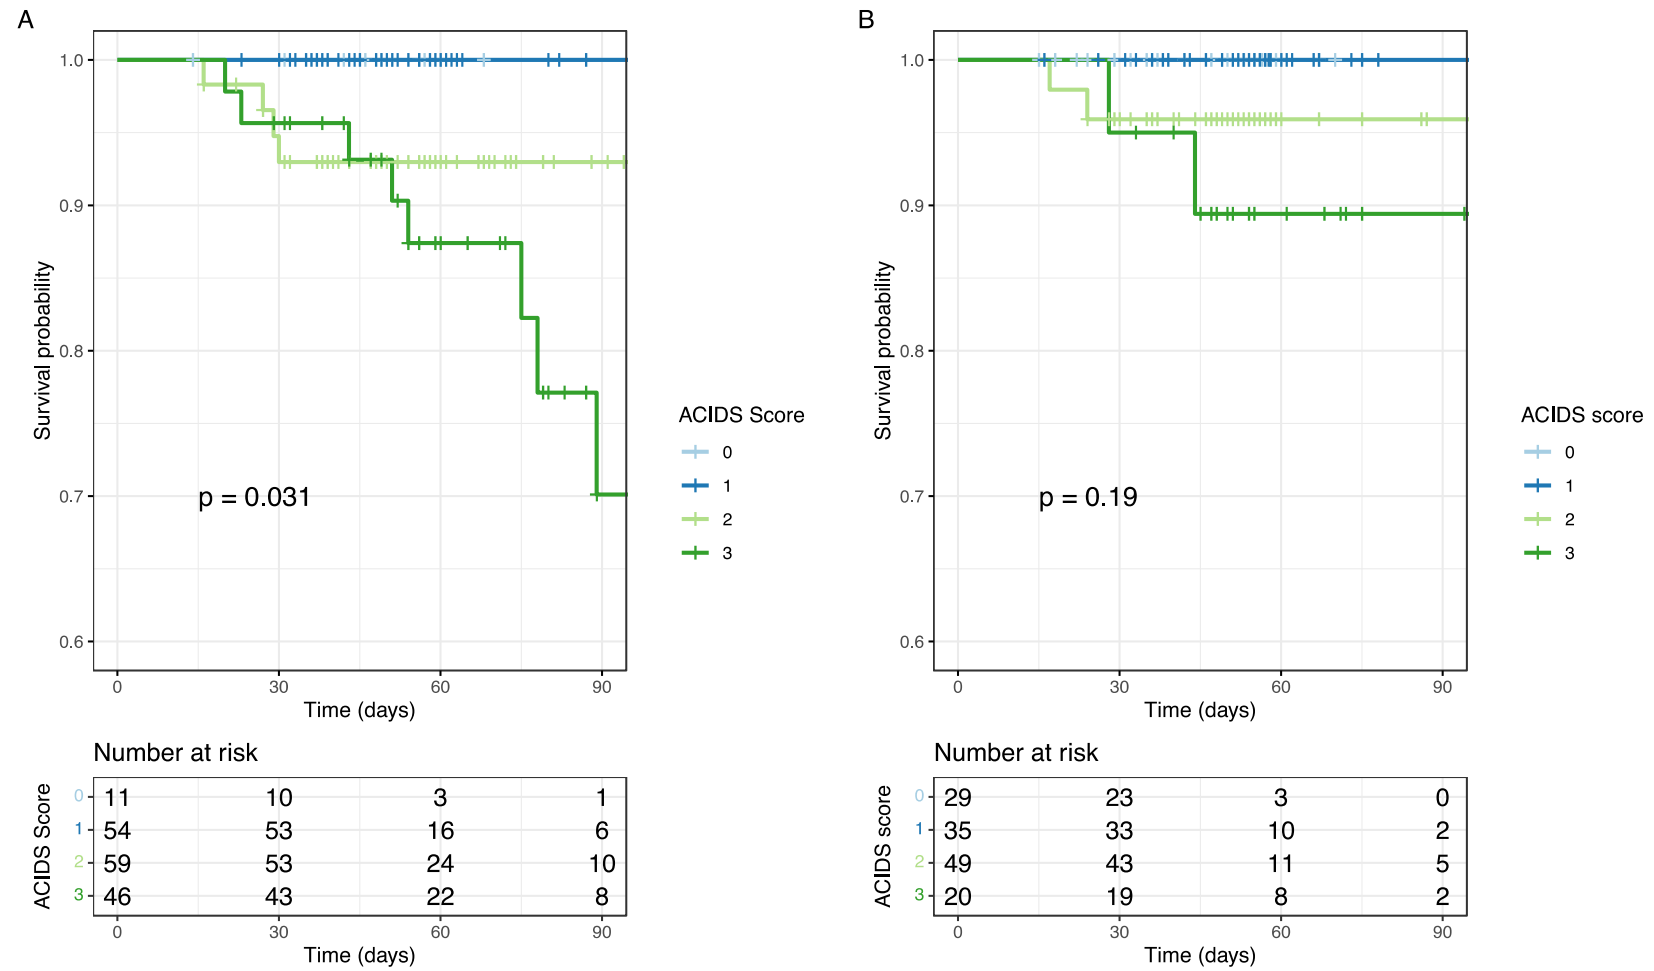

**Supplementary Fig 2.** Kaplan-Meier curves for the survival to discharge rate

(A, derivation cohort, n = 170; B, validation cohort, n = 133.)

**Supplementary Table 1.** Characteristics of patients in the derivation and validation cohort.

IQR, interquartile range; AIS, Abbreviated Injury Scale; CRP, C-reactive protein.

| Characteristics                            | Derivation<br>(n = 170) | Validation<br>(n = 133) |
|--------------------------------------------|-------------------------|-------------------------|
| <b>Maximum AIS in each body region</b>     |                         |                         |
| AIS for head, median (IQR)                 | 1 (0–3)                 | 3 (0–4)                 |
| AIS for face, median (IQR)                 | 0 (0–0)                 | 0 (0–0)                 |
| AIS for neck, median (IQR)                 | 0 (0–0)                 | 0 (0–0)                 |
| AIS for chest, median (IQR)                | 4 (3–4)                 | 3 (0–4)                 |
| AIS for abdomen, median (IQR)              | 0 (0–3)                 | 0 (0–0)                 |
| AIS for spine, median (IQR)                | 0 (0–3)                 | 0 (0–3)                 |
| AIS for upper extremities, median (IQR)    | 0 (0–2)                 | 0 (0–2)                 |
| AIS for lower extremities, median (IQR)    | 0 (0–3)                 | 1 (0–3)                 |
| AIS for external, median (IQR)             | 0 (0–0)                 | 0 (0–0)                 |
| <b>Mechanism of injuries</b>               |                         |                         |
| Motor vehicle collision, occupant, n (%)   | 39 (22.9)               | 26 (19.5)               |
| Motor vehicle collision, motorcycle, n (%) | 31 (18.2)               | 13 (9.8)                |
| Motor vehicle collision, bicycle, n (%)    | 11 (6.5)                | 20 (15.0)               |
| Motor vehicle collision, pedestrian, n (%) | 27 (15.9)               | 19 (14.3)               |
| Fall from height, n (%)                    | 19 (11.2)               | 8 (6.0)                 |
| Fall from stairs, n (%)                    | 17 (10.0)               | 26 (19.5)               |

|                                                    |                  |                  |
|----------------------------------------------------|------------------|------------------|
| Fall from standing, n (%)                          | 2 (1.2)          | 4 (3.0)          |
| Compression injury, n (%)                          | 10 (5.9)         | 2 (1.5)          |
| Stab wound, n (%)                                  | 2 (1.2)          | 1 (0.7)          |
| Others, n (%)                                      | 12 (7.1)         | 14 (10.5)        |
| <b>Hospital course</b>                             |                  |                  |
| Intubation, n (%)                                  | 163 (95.9)       | 116 (87.2)       |
| Emergency operation, n (%)                         | 79 (52.7)        | 54 (40.6)        |
| Days to start nutrition, median (IQR), days        | 4 (3.0–6.0)      | 2 (2.0–3.0)      |
| Maximum CRP, median (IQR), mg/dL                   | 21.8 (16.5–27.2) | 18.5 (12.5–25.5) |
| Minimum albumin, median (IQR), g/dL                | 2.5 (2.3–2.6)    | 2.5 (2.3–2.7)    |
| Episode of infection until day 7, n (%)            | 91 (53.5)        | 52 (39.1)        |
| Pneumonia, n (%)                                   | 75 (44.1)        | 47 (35.3)        |
| Surgical Site Infection, n (%)                     | 5 (2.9)          | 1 (0.8)          |
| Catheter related blood stream infection, n (%)     | 3 (1.8)          | 0 (0.0)          |
| Peritonitis, n (%)                                 | 4 (2.4)          | 1 (0.8)          |
| Others, n (%)                                      | 4 (2.4)          | 2 (1.5)          |
| Length of stay in ICU $\geq$ 14 days, n (%)        | 64 (37.6)        | 48 (36.1)        |
| Tracheostomy, n (%)                                | 136 (80.0)       | 82 (61.7)        |
| Mechanical ventilation days $\geq$ 96 hours, n (%) | 157 (96.3)       | 113 (85.0)       |
| Poor wound healing, n (%)                          | 27 (15.9)        | 16 (12.0)        |
| Renal replacement therapy, n (%)                   | 26 (15.3)        | 19 (14.3)        |

**Supplementary Table 2.** Sensitivity, specificity, and positive and negative predictive value of each score to predict PICS.

Data were shown with calculated value by defining as having that score or higher, and 95% confidence interval.

PPV, positive predictive value; NPV, negative predictive value; PICS, persistent inflammation, immunosuppression, and catabolism syndrome.

| Cut-off score | Derivation cohort |                  |                  |                  | Validation cohort |                  |                  |                  |
|---------------|-------------------|------------------|------------------|------------------|-------------------|------------------|------------------|------------------|
|               | Sensitivity       | Specificity      | PPV              | NPV              | Sensitivity       | Specificity      | PPV              | NPV              |
| 1             | 0.97 (0.90–1.00)  | 0.09 (0.04–0.16) | 0.41 (0.33–0.49) | 0.82 (0.48–0.98) | 0.96 (0.85–0.99)  | 0.31 (0.21–0.41) | 0.42 (0.32–0.52) | 0.93 (0.77–0.99) |
| 2             | 0.84 (0.73–0.92)  | 0.52 (0.42–0.62) | 0.53 (0.43–0.63) | 0.83 (0.72–0.91) | 0.76 (0.61–0.87)  | 0.61 (0.50–0.71) | 0.51 (0.38–0.63) | 0.83 (0.71–0.91) |
| 3             | 0.48 (0.35–0.60)  | 0.86 (0.78–0.92) | 0.70 (0.54–0.82) | 0.72 (0.63–0.79) | 0.26 (0.14–0.41)  | 0.91 (0.83–0.96) | 0.60 (0.36–0.81) | 0.70 (0.61–0.78) |

**Supplementary Table 3.** Multivariable logistic regression model assessing the occurrence of PICS-related composite outcome  
ISS, Injury Severity Score; SBP, systolic blood pressure; GCS, Glasgow Coma Scale.

| Variables            | Derivation cohort (n = 170) |              |         | Validation cohort (n = 133) |              |         |
|----------------------|-----------------------------|--------------|---------|-----------------------------|--------------|---------|
|                      | Odds ratio                  | 95%CI        | p value | Odds ratio                  | 95%CI        | p value |
| ACIDS Score          | 3.18                        | (2.04, 4.97) | <0.001  | 2.66                        | (1.66, 4.24) | <0.001  |
| Age, yr              | 0.57                        | (0.28, 1.15) | 0.117   | 1.00                        | (0.98, 1.02) | 0.81    |
| ISS                  | 1.003                       | (0.98, 1.03) | 0.797   | 1.02                        | (0.98, 1.06) | 0.34    |
| SBP on arrival, mmHg | 0.99                        | (0.99, 1.00) | 0.156   | 1.00                        | (0.99, 1.01) | 0.40    |
| GCS on arrival       | 0.99                        | (0.91, 1.08) | 0.839   | 0.93                        | (0.84, 1.03) | 0.15    |

**Supplementary Table 4.** Multivariable logistic regression model assessing in-hospital mortality  
ISS, Injury Severity Score; SBP, systolic blood pressure; GCS, Glasgow Coma Scale.

| Variables            | Derivation cohort (n = 170) |               |         | Validation cohort (n = 133) |              |         |
|----------------------|-----------------------------|---------------|---------|-----------------------------|--------------|---------|
|                      | Odds ratio                  | 95%CI         | p value | Odds ratio                  | 95%CI        | p value |
| ACIDS Score          | 4.61                        | (1.64, 12.95) | < 0.01  | 5.73                        | (0.87, 37.6) | 0.07    |
| Age, yr              | 1.01                        | (0.98, 1.04)  | 0.59    | 0.99                        | (0.93, 1.04) | 0.62    |
| ISS                  | 1.02                        | (0.97, 1.07)  | 0.40    | 0.97                        | (0.90, 1.05) | 0.45    |
| SBP on arrival, mmHg | 1.00                        | (0.98, 1.01)  | 0.80    | 0.99                        | (0.97, 1.02) | 0.57    |
| GCS on arrival       | 0.93                        | (0.81, 1.07)  | 0.31    | 0.82                        | (0.63, 1.07) | 0.14    |



**Supplementary Table 5.** Multivariable logistic regression model assessing multiple episodes of infection  
ISS, Injury Severity Score; SBP, systolic blood pressure; GCS, Glasgow Coma Scale.

| Variables            | Derivation cohort (n = 170) |              |         | Validation cohort (n = 133) |              |         |
|----------------------|-----------------------------|--------------|---------|-----------------------------|--------------|---------|
|                      | Odds ratio                  | 95%CI        | p value | Odds ratio                  | 95%CI        | p value |
| ACIDS Score          | 2.54                        | (1.68, 3.83) | <0.001  | 1.62                        | (1.06, 2.47) | 0.03    |
| Age, yr              | 1.01                        | (0.99, 1.03) | 0.42    | 1.02                        | (1.00, 1.04) | 0.12    |
| ISS                  | 1.01                        | (0.99, 1.04) | 0.39    | 0.99                        | (0.96, 1.03) | 0.76    |
| SBP on arrival, mmHg | 1.00                        | (0.99, 1.01) | 0.37    | 1.01                        | (1.00, 1.02) | 0.37    |
| GCS on arrival       | 0.99                        | (0.92, 1.07) | 0.85    | 0.91                        | (0.82, 1.00) | 0.05    |

**Supplementary Table 6.** Multivariable linear regression model assessing SOFA score at day 14  
 SOFA, Sequential Organ Failure Assessment; ISS, Injury Severity Score; SBP, systolic blood pressure; GCS, Glasgow Coma Scale.

| Variables            | Derivation cohort (n = 170) |                 |         | Validation cohort (n = 133) |                |         |
|----------------------|-----------------------------|-----------------|---------|-----------------------------|----------------|---------|
|                      | Coefficient                 | 95%CI           | p value | Coefficient                 | 95%CI          | p value |
| ACIDS Score          | 0.66                        | (0.25, 1.08)    | < 0.01  | 0.91                        | (0.50, 1.32)   | < 0.001 |
| Age, yr              | 0.03                        | (0.01, 0.05)    | < 0.01  | 0.03                        | (0.01, 0.05)   | < 0.01  |
| ISS                  | 0.00                        | (-0.03, 0.03)   | 0.94    | 0.03                        | (-0.01, 0.07)  | 0.09    |
| SBP on arrival, mmHg | -0.01                       | (-0.02, -0.001) | 0.04    | 0.001                       | (-0.01, 0.01)  | 0.89    |
| GCS on arrival       | -0.08                       | (-0.17, 0.01)   | 0.07    | -0.13                       | (-0.23, -0.03) | 0.01    |

**Supplementary Table 7.** Multivariable linear regression model assessing duration of mechanical ventilation  
ISS, Injury Severity Score; SBP, systolic blood pressure; GCS, Glasgow Coma Scale.

| Variables            | Derivation cohort (n = 170) |               |         | Validation cohort (n = 133) |                |         |
|----------------------|-----------------------------|---------------|---------|-----------------------------|----------------|---------|
|                      | Coefficient                 | 95%CI         | p value | Coefficient                 | 95%CI          | p value |
| ACIDS Score          | 4.42                        | (2.06, 6.78)  | <0.001  | 2.82                        | (1.87, 3.77)   | <0.001  |
| Age, yr              | 0.02                        | (-0.09, 0.13) | 0.78    | 0.03                        | (-0.02, 0.08)  | 0.22    |
| ISS                  | 0.00                        | (-0.16, 0.16) | 0.97    | 0.14                        | (0.05, 0.22)   | 0.00    |
| SBP on arrival, mmHg | -0.04                       | (-0.09, 0.02) | 0.19    | 0.00                        | (-0.03, 0.02)  | 0.93    |
| GCS on arrival       | -0.22                       | (-0.72, 0.28) | 0.39    | -0.29                       | (-0.52, -0.06) | 0.02    |

**Supplementary Table 8.** Multivariable linear regression model assessing length of stay in ICU  
ISS, Injury Severity Score; SBP, systolic blood pressure; GCS, Glasgow Coma Scale.

| Variables            | Derivation cohort (n = 170) |                 |         | Validation cohort (n = 133) |               |         |
|----------------------|-----------------------------|-----------------|---------|-----------------------------|---------------|---------|
|                      | Coefficient                 | 95%CI           | p value | Coefficient                 | 95%CI         | p value |
| ACIDS Score          | 2.26                        | (1.25, 0.20)    | <0.001  | 1.92                        | (1.07, 2.77)  | <0.001  |
| Age, yr              | -0.05                       | (-0.10, -0.01)  | 0.03    | 0.03                        | (-0.02, 0.07) | 0.22    |
| ISS                  | 0.004                       | (-0.072, 0.064) | 0.91    | 0.03                        | (-0.04, 0.11) | 0.40    |
| SBP on arrival, mmHg | -0.03                       | (-0.05, -0.003) | 0.03    | -0.01                       | (-0.03, 0.01) | 0.37    |
| GCS on arrival       | 0.01                        | (-0.35, 0.08)   | 0.23    | -0.05                       | (-0.26, 0.16) | 0.61    |

**Supplementary Table 9.** Multivariable linear regression model assessing length of stay in hospital  
ISS, Injury Severity Score; SBP, systolic blood pressure; GCS, Glasgow Coma Scale.

| Variables            | Derivation cohort (n = 170) |                |         | Validation cohort (n = 133) |               |         |
|----------------------|-----------------------------|----------------|---------|-----------------------------|---------------|---------|
|                      | Coefficient                 | 95%CI          | p value | Coefficient                 | 95%CI         | p value |
| ACIDS Score          | 11.72                       | (3.75, 19.69)  | 0.004   | 3.97                        | (-0.84, 8.77) | 0.11    |
| Age, yr              | -0.54                       | (-0.92, -0.17) | 0.01    | 0.13                        | (-0.10, 0.36) | 0.27    |
| ISS                  | 0.10                        | (-0.44, 0.64)  | 0.71    | 0.08                        | (-0.36, 0.51) | 0.73    |
| SBP on arrival, mmHg | -0.13                       | (-0.30, 0.05)  | 0.16    | -0.04                       | (-0.16, 0.08) | 0.54    |
| GCS on arrival       | 0.07                        | (-1.62, 1.77)  | 0.93    | -0.66                       | (-1.84, 0.52) | 0.27    |
